# Supplementary material
Source: PubMed Central journal article supplement (PMC8764620)
Supplement: NIHMS1698142-supplement-Supplementary_Material.pdf [file NIHMS1698142-supplement-Supplementary_Material.pdf]

Supplemental table 1. Phase I or phase I/II trials with new drugs in myeloproliferative neoplasms

| <b>Author (year)</b>                                          | <b>Study phase</b> | <b>Drug</b>  | <b>Disease</b>    | <b>N. of patients</b> | <b>Population</b>                                                                                                             | <b>Primary endpoint</b>                                 |
|---------------------------------------------------------------|--------------------|--------------|-------------------|-----------------------|-------------------------------------------------------------------------------------------------------------------------------|---------------------------------------------------------|
| Verstovsek et al., Leuk Res, 2013 <sup>1</sup>                | Phase I            | XL019        | MF                | 30                    | In need of therapy with <20% blasts in BM. Pts. with pre-existing peripheral neuropathy excluded (by animal toxicity studies) | Safety; PK; Response                                    |
| Mascarenhas et al., BJH, 2013 <sup>2</sup>                    | Phase I/II         | Panobinostat | MF                | 18                    | High- or intermediate-risk patients (Lille score)                                                                             | DLT; MTD; Adverse events; Response                      |
| Pardanani et al., Leukemia, 2013 <sup>3</sup>                 | Phase I/II         | CYT387       | MF                | 60                    | High- or intermediate II-risk (IWG) or intermediate-1 with either hepatosplenomegaly or unresponsiveness to therapies         | Safety and tolerability; therapeutic dose; PK; Response |
| Foran et al., Clin Lymphoma, Myeloma Leuk., 2013 <sup>4</sup> | Phase I            | AT9283       | ALL, AML, CML, MF | 48 (MF=9)             | Advanced MF patients                                                                                                          | DLT; MTD; PK; Response                                  |
| Pardanani et al., JCO, 2011 <sup>5</sup>                      | Phase I            | TG101348     | MF                | 59                    | High- or intermediate-risk patients (IWG)                                                                                     | Safety and tolerability; DLT; MTD; PK; Response         |
| Barosi et al., Am J Hematol,                                  | Phase 1-2          | Bortezomib   | MF                | 20                    | High- or intermediate-risk patients (IWG score)                                                                               | Safety; DLT; MTD; Response                              |

|                                               |            |             |    |     |                                                                                                                                                                                                                                                         |                                          |
|-----------------------------------------------|------------|-------------|----|-----|---------------------------------------------------------------------------------------------------------------------------------------------------------------------------------------------------------------------------------------------------------|------------------------------------------|
| 2010 <sup>6</sup>                             |            |             |    |     |                                                                                                                                                                                                                                                         |                                          |
| Verstovsek et al., NEJM 2010 <sup>7</sup>     | Phase I/II | Ruxolitinib | MF | 153 | Patients requiring therapy, had had a relapse or had severe side effects from therapy or disease that was refractory to previous therapy. If newly diagnosed disease: intermediate or high risk disease; symptomatic splenomegaly (10 cm below the LCM) | Safety; tolerability; DLT; MTD; Response |
| Guglielmelli et al., Blood, 2011 <sup>8</sup> | Phase I/II | Everolimus  | MF | 39  | High or intermediate risk (Lille score), or low-risk with splenomegaly >10 cm from LCM                                                                                                                                                                  | MTD; Response (EUMNET response criteria) |

Legend: IWG = International Working Group; MF = myelofibrosis; PK = pharmacokinetics; DLT = Dose limiting toxicity; MTD = maximum tolerated dose

Supplemental table 2: Phase II trials with new drugs in myeloproliferative neoplasms

| Author (year)                                        | Study phase        | Drug                             | Disease                 | N. of Patients | Population                                                                                                             | Primary endpoint                                                               |
|------------------------------------------------------|--------------------|----------------------------------|-------------------------|----------------|------------------------------------------------------------------------------------------------------------------------|--------------------------------------------------------------------------------|
| Andersen et al., BJH, 2013 <sup>9</sup>              | Phase II           | Vorinostat                       | PV and ET               | 63             | In need of cytoreductive therapy or intolerant to other therapies                                                      | Response (ELN)                                                                 |
| Finazzi et al., BJH, 2013 <sup>10</sup>              | Phase II           | Givinostat plus hydroxycarbamide | PV                      | 44             | Unresponsive to hydroxycarbamide monotherapy                                                                           | Response (ELN)                                                                 |
| De Angelo et al., BJH, 2013 <sup>11</sup>            | Phase II           | Panobinostat                     | MF                      | 35             | Intermediate II or high risk disease                                                                                   | Response (IWG-MRT)                                                             |
| Talpaz et al., J Hematol Oncol, 2013 <sup>12</sup>   | Phase II           | Ruxolitinib                      | MF (with low platelets) | 34             | Symptoms (MFSAF 1>5 or 2>3); Platelet count 50-100 x10 <sup>9</sup> /L; Hb >65 g/L; PB blast count <5%; DIPSS score >1 | Response on splenomegaly by imaging (MRI)<br>Response on symptoms (MFSAF)      |
| Verstovsek et al., Cancer, 2013 <sup>13</sup>        | Phase II           | Ruxolitinib                      | PV                      | 34             | Refractory to treatment with HU or for whom HU was contraindicated                                                     | Response rate (ELN)                                                            |
| Mesa et al., Haematologica, 2013 <sup>14</sup>       | Phase II (2 stage) | Bevacizumab                      | MF                      | 13             | Symptomatic; relapsed/refractory; Intermediate- or high-risk patients                                                  | Response rate (complete and major best response by 6 months) according IWG-MRT |
| Quintas-Cardama et al., Leuk Res, 2012 <sup>15</sup> | Phase II           | Pracinostat                      | MF                      | 22             | Intermediate 1, intermediate 2 or high-risk disease or with low risk and symptomatic                                   | Response (IWG-MRT)                                                             |

|                                                                        |          |                    |                                          |           |                                                                                                                                                                                                                                                            |                       |
|------------------------------------------------------------------------|----------|--------------------|------------------------------------------|-----------|------------------------------------------------------------------------------------------------------------------------------------------------------------------------------------------------------------------------------------------------------------|-----------------------|
|                                                                        |          |                    |                                          |           | splenomegaly                                                                                                                                                                                                                                               |                       |
| Bejanyan et al.,<br>Cancer, 2012 <sup>16</sup>                         | Phase II | TADA               | Myelododysplastic/myeloproliferative, MF | 28 (MF=5) | Performance status from 0 to 2                                                                                                                                                                                                                             | Response (IWG)        |
| Apostolidou et al.,<br>Cl Lymphoma Myeloma Leuk,<br>2010 <sup>17</sup> | Phase II | Sunitinib          | MF                                       | 14        | If patients required therapy, had had a relapse or had severe side effects from therapy or disease that was refractory to previous therapy. If newly diagnosed disease: intermediate- or high-risk disease; symptomatic splenomegaly (10 cm below the LCM) | Response (IWG)        |
| Parikh et al., Cl Lymphoma Myeloma Leuk,<br>2010 <sup>18</sup>         | Phase II | Obatoclox mesylate | MF                                       | 22        | ECOG<=2                                                                                                                                                                                                                                                    | PK; Response (IWG)    |
| Santos et al.,<br>Blood, 2010 <sup>19</sup>                            | Phase II | CEP-701            | MF                                       | 22        | Requiring therapy, including previously treated who were relapsed, intolerant or refractory                                                                                                                                                                | Response (IWG)        |
| Rambaldi et al.,<br>BJH, 2010 <sup>20</sup>                            | Phase II | Givinostat         | PV, ET, MF                               | 29        | In need of cytoreductive therapy; intolerant or refractory to hydroxycarbamide                                                                                                                                                                             | Response (ELN/EUMNET) |

Legend: LCM = left costal margin; PV = polycythemia vera; ET = essential thrombocythemia; IWG = International Working Group; PK = pharmacodynamics

Supplemental table 3. Phase III trials with new drugs in myeloproliferative neoplasms

| <b>Author (year)</b>                 | <b>Study phase</b> | <b>Disease</b> | <b>Design</b>    | <b>N. of patients</b> | <b>Population</b>                                                                                                                                                                                                                                    | <b>Primary Endpoint</b>                                                                                                           |
|--------------------------------------|--------------------|----------------|------------------|-----------------------|------------------------------------------------------------------------------------------------------------------------------------------------------------------------------------------------------------------------------------------------------|-----------------------------------------------------------------------------------------------------------------------------------|
| Harrison, NEJM, 2012 <sup>21</sup>   | Phase III          | MF             | Ruxo vs. BAT     | 219                   | Palpable spleen 5 cm or more below the costal margin<br>Intermediate2- or high-risk IPSS; Peripheral blasts less than 10%; Platelet count of 100 x10 <sup>9</sup> /L or more                                                                         | Reduction of 35% or more in spleen volume from baseline at week 48 (MRI or CT).                                                   |
| Verstovsek, NEJM, 2012 <sup>22</sup> | Phase III          | MF             | Ruxo vs. placebo | 309                   | Intermediate2- or high-risk IPSS; Peripheral blasts less than 10%; An absolute peripheral blood CD34+ cell count of more than 20x 10 <sup>6</sup> /L ; Platelet count of 100 x10 <sup>9</sup> /L or more; Palpable spleen 5 cm or more below the LCM | Proportion of patients with a reduction of 35% or more in spleen volume from baseline to week 24, measured by means of MRI or CT. |

Legend: BAT = best available therapy; LCM = left costal margin;

### Supplemental references

1. Verstovsek S, Tam CS, Wadleigh M, et al. Phase I evaluation of XL019, an oral, potent, and selective JAK2 inhibitor. *Leuk Res* 2014;38:316-322.
2. Mascarenhas J, Lu M, Li T, et al. A phase I study of panobinostat (LBH589) in patients with primary myelofibrosis (PMF) and post-polycythaemia vera/essential thrombocythaemia myelofibrosis (post-PV/ET MF). *Br J Haematol* 2013;161:68-75.
3. Pardanani A, Laborde RR, Lasho TL, et al. Safety and efficacy of CYT387, a JAK1 and JAK2 inhibitor, in myelofibrosis. *Leukemia* 2013;27:1322-1327.
4. Foran J, Ravandi F, Wierda W et al. A Phase I and Pharmacodynamic Study of AT9283, a Small-Molecule Inhibitor of Aurora Kinases in Patients With Relapsed/Refractory Leukemia or Myelofibrosis. *Clin Lymphoma Myeloma Leuk*. Nov. 2013
5. Pardanani A, Gotlib JR, Jamieson C, et al. Safety and efficacy of TG101348, a selective JAK2 inhibitor, in myelofibrosis. *J Clin Oncol* 2011;29:789-796.
6. Barosi G, Gattoni E, Guglielmelli P, et al. Phase I/II study of single-agent bortezomib for the treatment of patients with myelofibrosis. Clinical and biological effects of proteasome inhibition. *Am J Hematol* 2010;85:616-619.
7. Verstovsek S, Kantarjian H, Mesa RA, et al. Safety and efficacy of INCB018424, a JAK1 and JAK2 inhibitor, in myelofibrosis. *N Engl J Med* 2010;363:1117-127.
8. Guglielmelli P, Barosi G, Rambaldi A, et al. Safety and efficacy of everolimus, a mTOR inhibitor, as single agent in a phase 1/2 study in patients with myelofibrosis. *Blood* 2011;118:2069-2076.

9. Andersen CL, McMullin MF, Ejerblad E, et al. A phase II study of vorinostat (MK-0683) in patients with polycythaemia vera and essential thrombocythaemia. *Br J Haematol* 2013;162:498-508.
10. Finazzi G, Vannucchi AM, Martinelli V, et al. A phase II study of Givinostat in combination with hydroxycarbamide in patients with polycythaemia vera unresponsive to hydroxycarbamide monotherapy. *Br J Haematol* 2013;161:688-694.
11. DeAngelo DJ, Mesa RA, Fiskus W, et al. Phase II trial of panobinostat, an oral pan-deacetylase inhibitor in patients with primary myelofibrosis, post-essential thrombocythaemia, and post-polycythaemia vera myelofibrosis. *Br J Haematol* 2013;162:326-335.
12. Talpaz M, Paquette R, Afrin L, et al. Interim analysis of safety and efficacy of ruxolitinib in patients with myelofibrosis and low platelet counts. *J Hematol Oncol* 2013;6:81.
13. Verstovsek S, Passamonti F, Rambaldi A, et al. A phase 2 study of ruxolitinib, an oral JAK1 and JAK2 Inhibitor, in patients with advanced polycythemia vera who are refractory or intolerant to hydroxyurea. *Cancer* 2014;120:513-520.
14. Mesa RA, Silver RT, Verstovsek S, et al. Single agent bevacizumab for myelofibrosis: results of the Myeloproliferative Disorders Research Consortium Trial. *Haematologica* 2013;98:1421-1423.
15. Quintás-Cardama A, Kantarjian H, Estrov Z, et al. Therapy with the histone deacetylase inhibitor pracinostat for patients with myelofibrosis. *Leuk Res* 2012;36:1124-1127.
16. Bejanyan N, Tiu RV, Raza A, et al. A phase 2 trial of combination therapy with thalidomide, arsenic trioxide, dexamethasone, and ascorbic acid



- (TADA) in patients with overlap myelodysplastic/myeloproliferative neoplasms (MDS/MPN) or primary myelofibrosis (PMF). *Cancer* 2012;118:3968-3976.
17. Apostolidou E, Kantarjian H, Thomas D, et al. Phase II study of sunitinib in patients with primary or post-polycythemia vera/essential thrombocythemia myelofibrosis. *Clin Lymphoma Myeloma Leuk* 2010;10:281-284.
  18. Parikh SA, Kantarjian H, Schimmer A, et al. Phase II study of obatoclox mesylate (GX15-070), a small-molecule BCL-2 family antagonist, for patients with myelofibrosis. *Clin Lymphoma Myeloma Leuk* 2010;10:285-289.
  19. Santos FP, Kantarjian HM, Jain N, et al. Phase 2 study of CEP-701, an orally available JAK2 inhibitor, in patients with primary or post-polycythemia vera/essential thrombocythemia myelofibrosis. *Blood* 2010;115:1131-1136.
  20. Rambaldi A, Dellacasa CM, Finazzi G, et al. A pilot study of the Histone-Deacetylase inhibitor Givinostat in patients with JAK2V617F positive chronic myeloproliferative neoplasms. *Br J Haematol* 2010;150:446-455.
  21. Verstovsek S, Mesa RA, Gotlib J, et al: A double-blind, placebo-controlled trial of ruxolitinib for myelofibrosis. *N Engl J Med* 2012;366:799-807.
  22. Harrison C, Kiladjan JJ, Al-Ali HK, et al. JAK inhibition with ruxolitinib versus best available therapy for myelofibrosis. *N Engl J Med* 2012;366:787-798.
